# Supplementary material for: Hydrogen evolution reaction following the Slater–Pauling curve: acceleration of rate processes induced from dipole interaction between protons and ferromagnetic catalysts
Source: Royal Society of Chemistry journal article supplement (doi:10.1039/d2ra07865a), 2023-01-01
Supplement: d2ra07865a1.pdf [file d2ra07865a1.pdf]

ARTICLE

Supplementary data

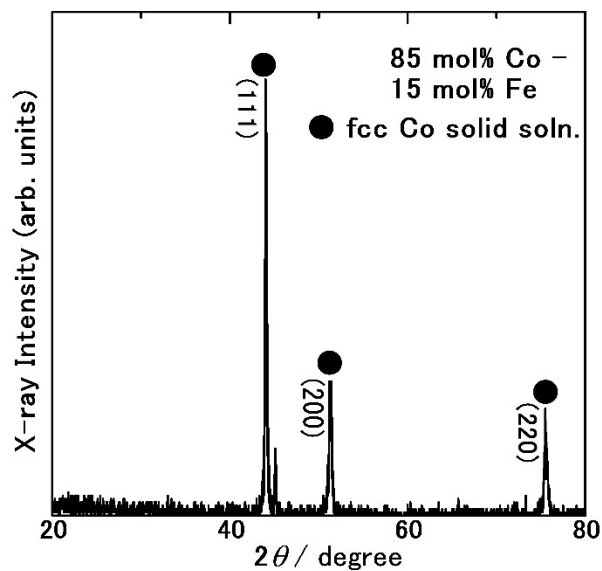

Fig.S-1 XRD pattern of 85 mol% Co – 15 mol% Fe sample composed of fcc Co solid solution.<sup>47</sup>

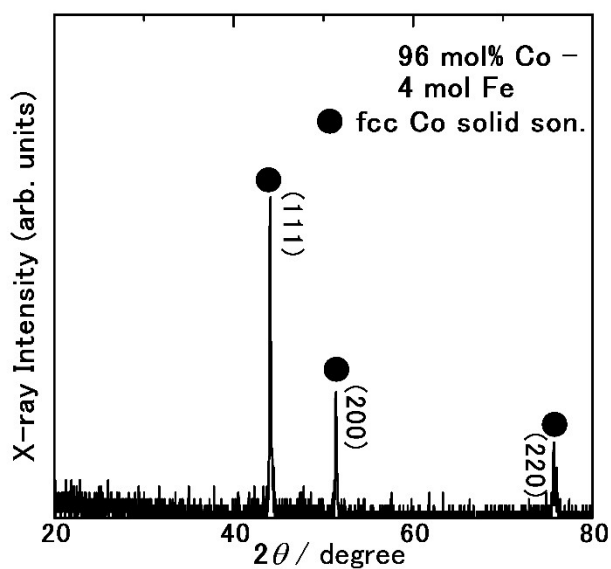

Fig.S-2 XRD pattern of 96 mol% Co – 4 mol% Fe sample composed of fcc Co solid solution.<sup>47</sup>

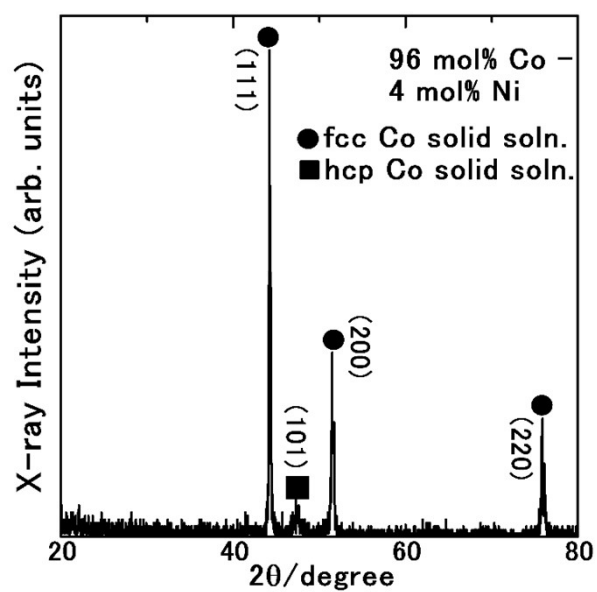

Fig.S-3 XRD pattern of 96 mol% Co – 4 mol% Fe sample composed of fcc Co solid solution.<sup>47</sup>

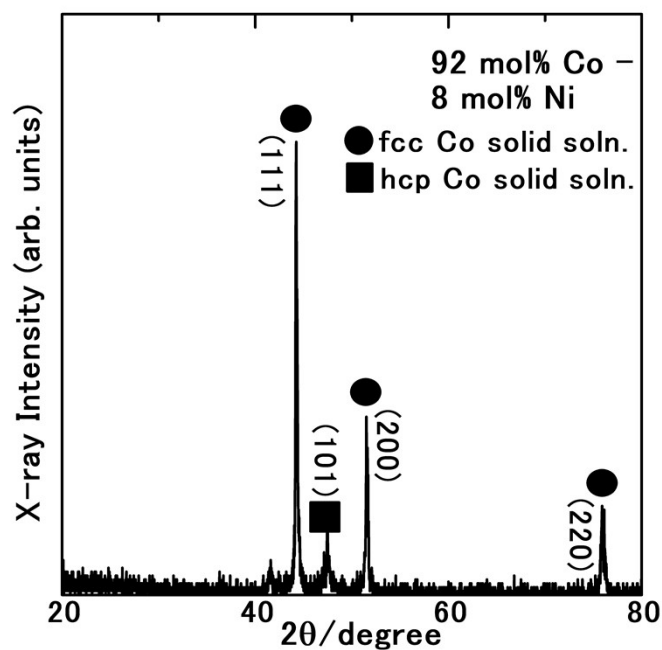

Fig.S-4 XRD pattern of 92 mol% Co – 8 mol% Ni sample composed of fcc<sup>47</sup> and hcp<sup>48</sup> Co solid solutions.

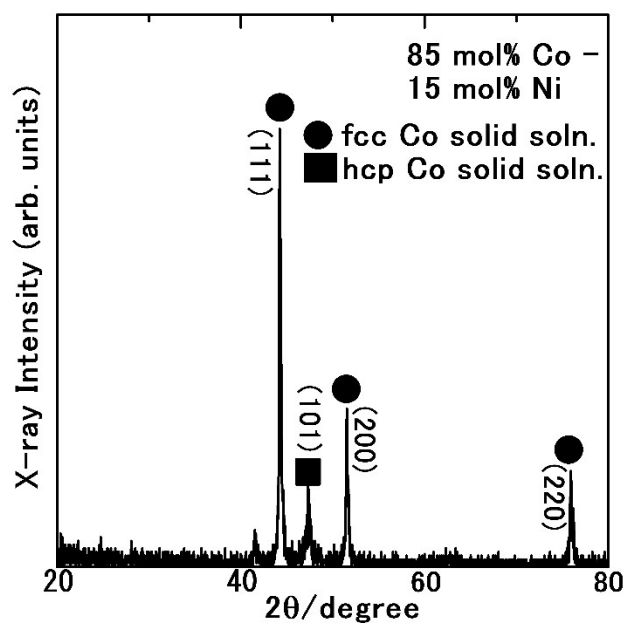

Fig.S-5 XRD pattern of 85 mol% Co – 15 mol% Ni sample composed of fcc<sup>47</sup> and hcp<sup>48</sup> Co solid solutions.

Table S1 Summary of the thermodynamic values at 298.15 K and their uncertainties,  $U$ , of the substances of interest.

| Substances                           | $\Delta_f H_m^\circ$ / (kJ (mol of compd.) <sup>-1</sup> ) | $U(\Delta_f H_m^\circ)$ / (kJ (mol of compd.) <sup>-1</sup> ) | $S_m^\circ$ / (J K <sup>-1</sup> (mol of compd.) <sup>-1</sup> ) | $U(S_m^\circ)$ / (J K <sup>-1</sup> (mol of compd.) <sup>-1</sup> ) | $\Delta_f G_m^\circ$ / (kJ (mol of compd.) <sup>-1</sup> ) | $U(\Delta_f G_m^\circ)$ / (kJ (mol of compd.) <sup>-1</sup> ) | Refs. |
|--------------------------------------|------------------------------------------------------------|---------------------------------------------------------------|------------------------------------------------------------------|---------------------------------------------------------------------|------------------------------------------------------------|---------------------------------------------------------------|-------|
| NH <sub>3</sub> BH <sub>3</sub> (cr) | -178.0                                                     | ± 5.9                                                         | unknown                                                          | -                                                                   | unknown                                                    | -                                                             | (37)  |
| NH <sub>3</sub> (aq)                 | -81.170                                                    | ± 0.326                                                       | 109.040                                                          | ± 0.913                                                             | -26.673                                                    | ± 0.305                                                       | (49)  |
| NH <sup>4+</sup> (aq)                | -133.260                                                   | ± 0.250                                                       | 111.170                                                          | ± 0.400                                                             | -79.398                                                    | ± 0.278                                                       | (49)  |
| B(OH) <sub>3</sub> (aq)              | -1072.800                                                  | ± 0.800                                                       | 162.400                                                          | ± 0.600                                                             | -969.268                                                   | ± 0.820                                                       | (49)  |
| BO <sub>2</sub> <sup>-</sup> (aq)    | -772.37                                                    | ± 0.56 <sup>*2</sup>                                          | -37.2                                                            | ± 0.25 <sup>*2</sup>                                                | -678.89                                                    | ± 0.57 <sup>a</sup>                                           | (50)  |
| H <sub>2</sub> O(l)                  | -285.830                                                   | ± 0.040                                                       | 69.950                                                           | ± 0.030                                                             | -237.140                                                   | ± 0.041                                                       | (49)  |
| H <sub>2</sub> (g)                   | 0.000                                                      | ± 0.000                                                       | 130.680                                                          | ± 0.003                                                             | 0.000                                                      | ± 0.000                                                       | (49)  |

<sup>a</sup> Uncertainties of BO<sub>2</sub><sup>-</sup>(aq) were estimated to be equal to those of B(OH)<sub>3</sub>(aq).
